# Supplementary material for: Scleroderma fibroblasts suppress angiogenesis via TGF-β/caveolin-1 dependent secretion of pigment epithelium-derived factor
Source: PubMed Central journal article supplement — Ann Rheum Dis. 2017 Dec 19;77(3):431–40. doi: 10.1136/annrheumdis-2017-212120 (PMC5867407; doi:10.1136/annrheumdis-2017-212120), 2017-12-19

# Double staining PEDF (brown) & CD31 (red)

HC

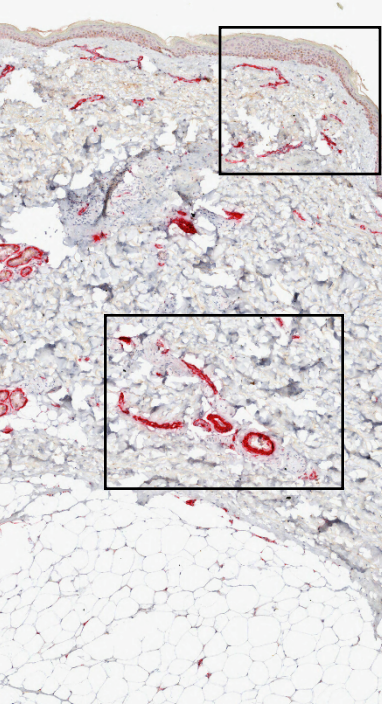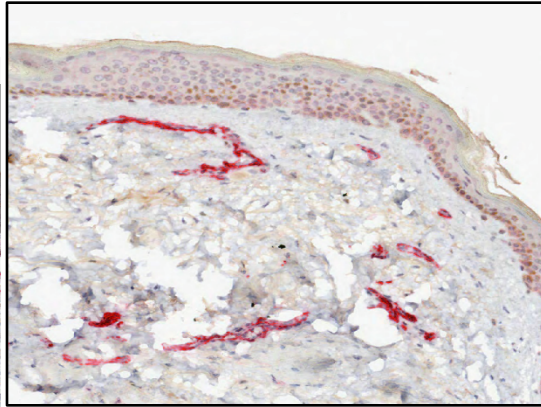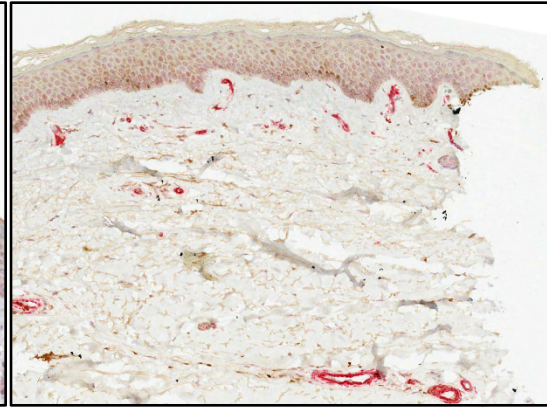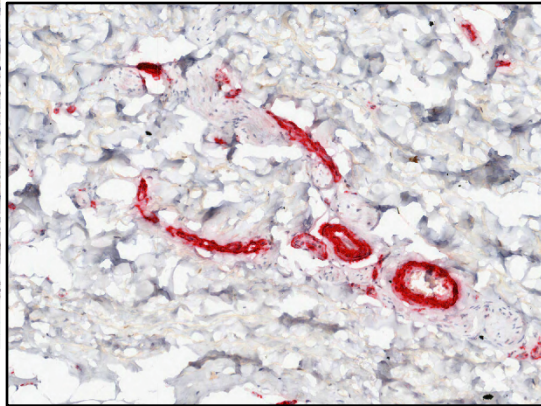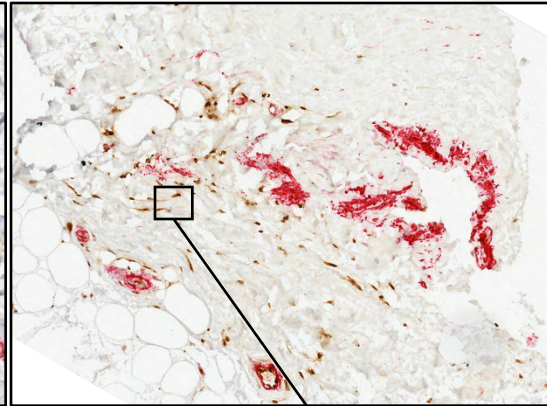

SSc

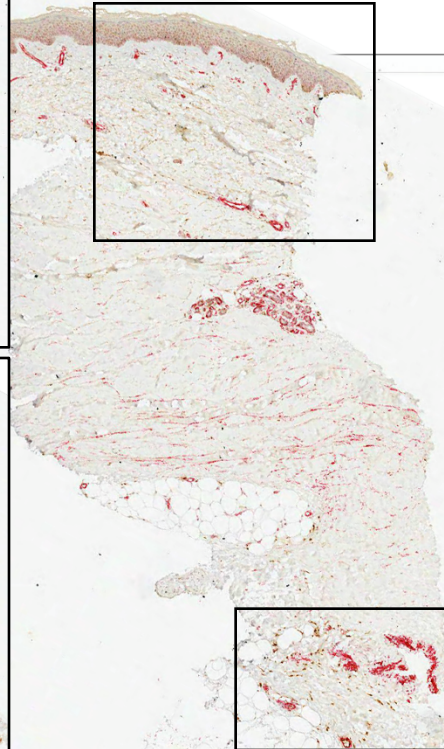

PEDF SMA

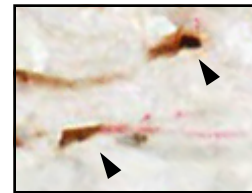

Double staining PEDF (brown) & CD31 (red)

HC

SSc

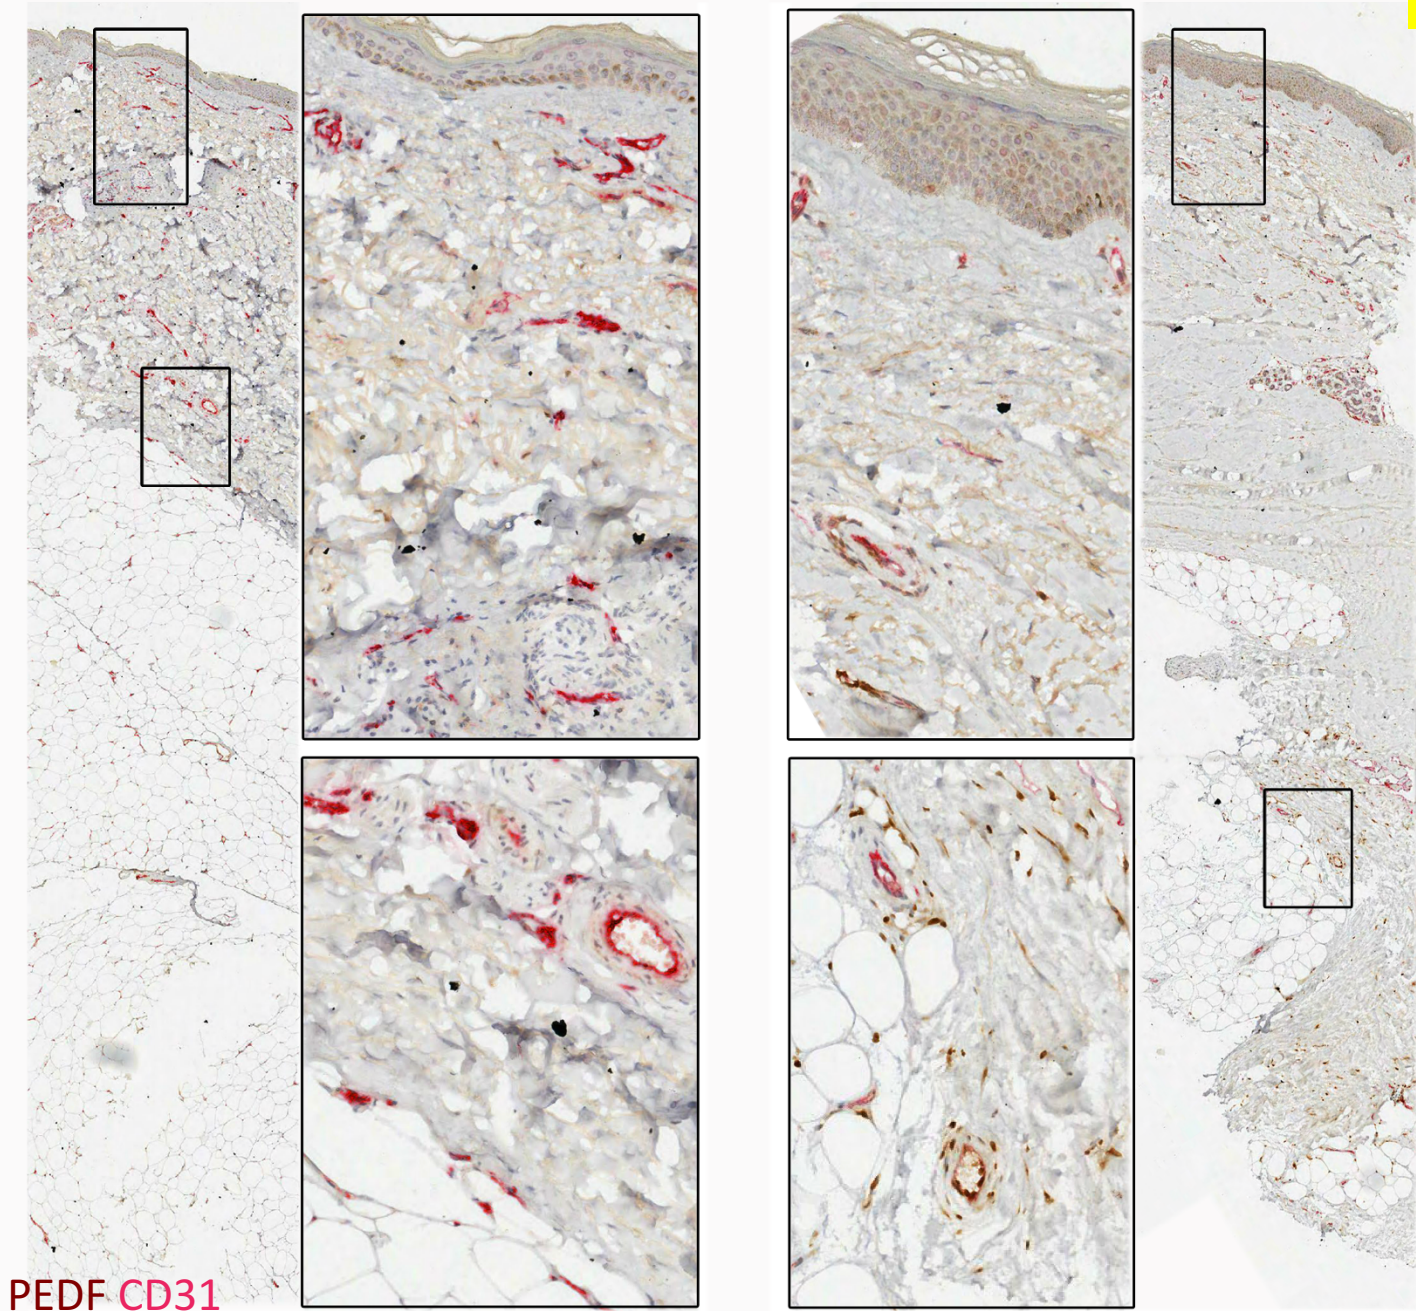

PEDF CD31

C

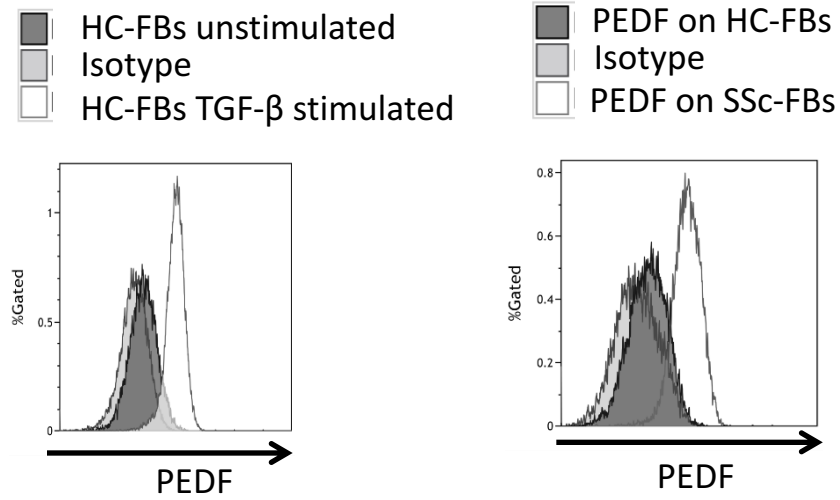

D

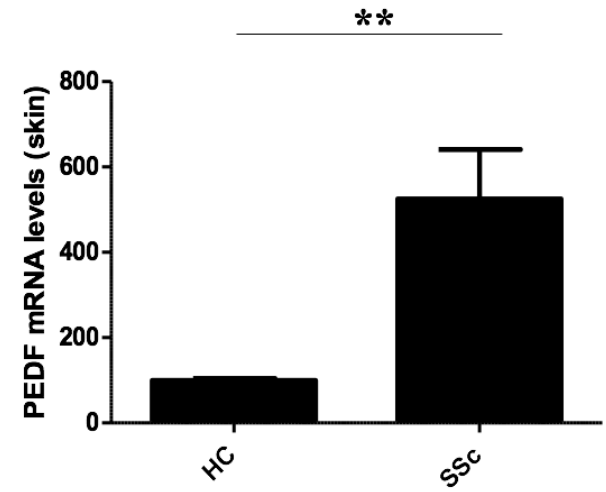

Supplement: annrheumdis-2017-212120supp002.pdf [file annrheumdis-2017-212120supp002.pdf]
