# Supplementary material for: Scleroderma fibroblasts suppress angiogenesis via TGF-β/caveolin-1 dependent secretion of pigment epithelium-derived factor
Source: PubMed Central journal article supplement — Ann Rheum Dis. 2017 Dec 19;77(3):431–40. doi: 10.1136/annrheumdis-2017-212120 (PMC5867407; doi:10.1136/annrheumdis-2017-212120), 2017-12-19
Supplement: annrheumdis-2017-212120supp003.pdf [file annrheumdis-2017-212120supp003.pdf]

Liakouli et al.

Supplementary Table 1. Blood vessel, PEDF and Caveolin positive cells average and SEM count in each biopsy

| <b>PATIENT</b>     | <b>No blood vessels</b> | <b>PEDF</b>     | <b>Cav-1</b>    | <b>Double PEDF+ Cav-1</b> | <b>Sex</b> | <b>Age</b>  |
|--------------------|-------------------------|-----------------|-----------------|---------------------------|------------|-------------|
| SSc#1              | 3.8±0.4                 | 31.4±5.2        | 19.4±2.8        | 5.6±1.1                   | M          | 47          |
| SSc#2              | 4.4±0.2                 | 32.6±3.1        | 16.0±3.6        | 6.9±1.1                   | F          | 67          |
| SSc#3              | 4.2±0.5                 | 44.4±9.0        | 26.8±4.7        | 5.8±0.6                   | F          | 71          |
| SSc#4              | 3.6±0.2                 | 18.0±2.5        | 19.0±1.4        | 3.7±0.8                   | F          | 58          |
| SSc#5              | 3.6±0.2                 | 45.6±6.5        | 26.0±3.9        | 2.1±0.5                   | F          | 62          |
| SSc#6              | 3.7±0.3                 | 34.8±1.8        | 18.6±0.8        | 3.7±0.1                   | F          | 49          |
| SSc#7              | 3.6±0.3                 | 26.3±1.4        | 17.3±0.6        | 5.2±0.7                   | F          | 56          |
| SSc#8              | 4.2±0.5                 | 33.9±1.7        | 22.9±0.4        | 6.9±0.3                   | F          | 61          |
| SSc#9              | 4.3±0.4                 | 42.6±4.2        | 24.8±1.1        | 2.9±0.4                   | F          | 59          |
| <b>Average SSc</b> | <b>3.9±0.3</b>          | <b>34.4±1.8</b> | <b>21.2±1.5</b> | <b>4.75±0.5</b>           |            | <b>58.8</b> |
|                    |                         |                 |                 |                           |            |             |
| <b>DONOR</b>       | <b>No blood vessels</b> | <b>PEDF</b>     | <b>Cav-1</b>    | <b>Double PEDF+ Cav-1</b> | <b>Sex</b> | <b>Age</b>  |
| HC#1               | 9.6 ±1.3                | 15.0±1.8        | 38.8±4.8        | 10.0±0.4                  | M          | 46          |
| HC#2               | 6.6 ±0.2                | 8.8 ±1.9        | 40.4±3.8        | 8.1±0.9                   | F          | 49          |
| HC#3               | 11.0±0.0                | 16 ±1.9         | 50.4±4.8        | 11.2±1.9                  | F          | 61          |
| HC#4               | 12.4±0.5                | 18.4±1.9        | 31.6±1.6        | 12.8±1.7                  | F          | 65          |
| HC#5               | 12.4±0.7                | 10.4±1.4        | 52.8±6.9        | 10.3±0.9                  | F          | 57          |
| HC#6               | 7.8 ±0.3                | 13.4±1          | 43.7±4.0        | 10.5±0.3                  | F          | 42          |
| HC#7               | 13.0±0.0                | 17.9±1.2        | 39.6±3.7        | 10.4±0.3                  | F          | 26          |
| HC#8               | 9.2 ±0.3                | 15±0.0          | 48.3±3.9        | 13.0±1.1                  | F          | 45          |
| HC#9               | 11.7±0.5                | 8.7±0.4         | 39.7±2.8        | 8.7±0.7                   | F          | 38          |
| <b>Average HC</b>  | <b>10.4±0.5</b>         | <b>13.7±0.9</b> | <b>42.8±1.8</b> | <b>10.5±0.6</b>           |            | <b>47.6</b> |
